*Environment*

**Attachment strength of seed mucilage prevents seed dislodgement in high surface flow: a mechanistic investigation**

Vincent S. Pan<sup>1,2,3</sup>, Cecilia Girvin<sup>1</sup>, Eric F. LoPresti<sup>1</sup>

1: Department of Plant Biology, Ecology, and Evolution, Oklahoma State University, 421  
Physical Sciences, Stillwater, Oklahoma 74078

2: Department of Integrative Biology, Michigan State University, 288 Farm Lane, East Lansing,  
Michigan 48824

3: Corresponding Author: vsbpan@gmail.com

**Key words**

Antitelechory, Erosion, Myxodiaspory, Seed functional traits, Seed mucilage

**Author contributions**

VSP, CG, & EFL designed the study, collected the data, and made the figures. VSP conducted the analysis. VSP & EFL wrote the manuscript. CG provided editorial support.

**Conflict of interest**

We declare no conflict of interest.

**Data availability statement**

All data and code used to generate this manuscript are available on Dryad and Zenodo respectively: <https://doi.org/10.25338/B81M00>

## Abstract

1. Seed mucilage is a common and highly diverse trait shared among thousands of angiosperms. While long recognized that mucilage allows seeds to anchor to substrates (antitelechory), we still lack a mechanistic understanding of this process.
2. We propose a mechanistic model of how mucilage affects substrate anchorage and fluid resistance, ultimately contributing to antitelechory. To test this model, we subjected mucilaginous seeds of 52 species, varying in eight measured seed traits, to a week of continuous water flow at a range of erosion potentials.
3. Supporting our model, mucilage mass increased both dry and wet attachment strength, which explained time to erosion well. A standard deviation increase in log mucilage mass increased seed time to dislodgement by 280 times. Fluid resistance was largely dependent on speed of water flow and the seed's modified drag coefficient, but not the quality of the seed or seed mucilage. Neither mucilage expansion speed nor mucilage decay rate explained dislodgement potential well.
4. Our results suggest that the high substrate anchorage strength is the primary role of mucilage in fostering seed establishment in highly erosive environments. In contrast, other seed and mucilage trait differences among species are of lesser importance to antitelechory.

## 1 **Introduction**

2           Diaspore mucilage (myxodiaspory, hereafter: seed mucilage) is an extremely widespread  
3 trait in plants with thousands of species across monocots and dicots (Grubert, 1974, 1981). When  
4 wetted, mucilage-secreting cells absorb water and swell up, eventually releasing a complex  
5 matrix of hydrated cellulosic, pectic, and hemicellulosic sugars (Grubert, 1974, Western, 2012,  
6 North et al., 2014). This matrix may be sticky or slippery when wet, but after drying, generally  
7 anchors seeds to substrates tightly (Kreitschitz et al., 2021b, Pan et al., 2021). Previous workers  
8 have observed its utility in anchorage (i.e. antitelechory) and noted its ubiquity among plants in  
9 highly erosive environments (Ellner & Schmida, 1981, Garcia-Fayos et al., 2013), and have  
10 experimentally demonstrated its role in antitelechory in two species of Cistaceae (Engelbrecht et  
11 al., 2014). Since seed mucilage is an amalgamation of measurable traits— chemical composition,  
12 structure, volume, and physical properties of both the mucilage envelope and seed (Grubert  
13 1974, Western, 2012, Kreitschitz & Gorb, 2018, Viudes et al., 2020, Cowley & Burton, 2020)—  
14 functional investigations across species can provide a mechanistic understanding of how this  
15 anchorage occurs and what trait combinations might have the highest antitelechorous potential.

16           In the few studies which have examined across species or populations, specific mucilage  
17 traits have been predictive of functional or ecological performance. In Pan et al. (2021), species  
18 with stronger anchorage were more protected from granivorous ants, as were seeds with more  
19 mucilage-bound sand (LoPresti et al., 2019). In the only example explicitly dealing with  
20 antitelechory, Engelbrecht et al. (2014) found that seeds of *Fumana ericoides* (Cistaceae) from  
21 low erosion sites produced significantly less mucilage than those from high erosion sites;  
22 suggesting functional variation in the trait, though another species in the same family  
23 (*Helianthemum violaceum*) did not show the same pattern. Much excellent experimental research

24 on the ecological functions of mucilage in relation to dispersal, germination, defense, and stress  
25 amelioration (e.g. Fuller & Hay, 1983, Huang et al., 2008, 2015, Kreitschitz et al., 2021a, Zhao  
26 et al., 2021) has been done, but only with one or a few species. Therefore, while we know many  
27 functional roles of mucilage in certain species, we do not know how specific aspects of mucilage  
28 contribute to these roles.

29         As mucilage traits vary both within and across species, determining the functional roles  
30 of this variation can provide insight into the evolutionary pressures shaping these traits. When  
31 looking broadly, mucilage mass and attachment potential measured across 53 plant species in  
32 LoPresti et al. (2019) and Pan et al. (2021) were strongly correlated among closer related species.  
33 However, when looking in-depth at close relatives, there is often much variation. Comparisons of  
34 many *Plantago* species reveals a wide variety of mucilage morphology across the genus (Cowley  
35 & Burton, 2021, Cowley et al. 2021) as does examining variation across populations of other  
36 widespread species or genera (e.g. Kreitschitz & Vallès, 2007, Inceer et al., 2012; Vilellas &  
37 Garcia, 2012, Engelbrecht et al., 2014, Poulain et al., 2019, Teixeira et al., 2020). Therefore,  
38 understanding mechanistic consequences of this variation is of paramount importance in  
39 interpretation of these documented patterns.

40         Across plants, particularly from desert or ruderal environments, myriad traits prevent  
41 primary or secondary dispersal and these traits are especially important in preventing  
42 dislodgement and transport into unsuitable habitat (Ellner & Schmida, 1981, Garcia-Fayos et al.,  
43 2013, Engelbrecht et al., 2014). Staying in place likely provides several advantages in many  
44 habitats. Seeds may avoid becoming badly abraded in the erosion process or the risk of burial  
45 with lower chance of emergence (Mennan & Zandstra, 2006). In environments where other  
46 plants are continuously filtered by erosion, the remaining plants may face little to no

47 competition, in contrast to areas where seeds collect after erosion in high numbers. The lower  
48 plant density also likely meant that there is lower pressure from disease (Bell et al., 2006) and  
49 herbivory (Kim & Underwood, 2015). Thus, antitelechory mechanisms may be seen as essential  
50 traits for certain plants to uniquely exploit highly erosive niches. For annuals especially,  
51 antitelechory may be important for continued occupation of suitable patches during the seed  
52 stage (Grubert et al., 1974, Ryding, 2001, Pan et al., 2021). However, these assertions are not  
53 meant to suggest that dispersal is not favorable in many instances; instead, the suites of traits that  
54 promote antitelechory are repeatedly evolved, and therefore, likely favorable in certain contexts  
55 (Ellner & Schmid, 1981).

56         Rainfall, and subsequent surface flow across steep slopes is a common type of  
57 dislodgement that is directional and may be responsible for staggering seed mortality. Han et al.  
58 (2011) found that 60-90% of seeds experimentally placed on shallow slopes were washed away  
59 in a single hour of heavy rain; similar results were reported by Aerts et al. (2006) who further  
60 found that the effect was most pronounced on bare slopes without leaf litter (neither used any  
61 mucilaginous seeds in their studies). A single, eight-hour rainfall event totaling 44 mm in a 60-ha  
62 watershed in Laos was estimated to have washed 1.34 million seeds into a river due to surface  
63 flow, estimated to be >1% of all seeds in the area (de Rouw et al., 2018). Given that the area  
64 receives 1403 mm of precipitation annually (de Rouw et al., 2018), this sort of flow could  
65 disperse or cause mortality to a large fraction of seeds produced each year. We know of no  
66 comparable estimates for other areas, but this sort of dislodgement is certainly a risk to seeds in  
67 many, if not all, habitats, and could represent powerful selective force on antitelechorous traits  
68 (Ellner & Schmid, 1981, Garcia-Fayos et al., 2013, Engelbrecht et al., 2014).

69           Imbibed seed mucilage binds seeds strongly to whatever it contacts, be it loose substrate,  
70 hard-packed substrate, rocks, leaves, or the mother plant itself as it dries (Pan et al., 2021).  
71 Mucilage has been documented to anchor seeds strongly against runoff in the field (*Plantago*  
72 *ovata*, Plantaginaceae: Ellner & Schmida, 1981) and laboratory (*Helianthemum violaceum* and *F.*  
73 *ericifolia*, Cistaceae: Engelbrecht et al., 2014). The anchorage strength of mucilage after a  
74 wetting-drying cycle is extremely strong and correlates positively with the amount of mucilage  
75 produced (Kreitschitz et al., 2021b, Pan et al., 2021). Wet mucilage is still sticky, which is  
76 important for zoochorous dispersal (Ryding, 2001), but the strength of attachment is  
77 considerably lower than after drying and has not been well characterized besides in flax, *Linum*  
78 *usitatissimum* (Kreitschitz et al., 2015). In the face of surface flow, the speed at which mucilage  
79 rehydrates, switching from stronger to weaker attachment, may thus contribute to the length of  
80 time that substrate anchorage is effective. Over longer periods, the breakdown of the mucilage  
81 layer in water may also reduce the amount of mucilage or strength of mucilage attachment,  
82 lowering resistance to dislodgement. Seed mucilage may further alter the fluid resistance in  
83 complex ways. The expansion of the mucilage envelope provides a larger area upon which  
84 flowing water may exert force on. However, some of the drag may be alleviated by the  
85 improvement in sphericity for more rigid mucilage envelopes or closer resemblance to a  
86 streamlined shape for more malleable mucilage envelopes in fast flowing water. In addition,  
87 lubrication provided by the mucilage layer between water and seed may reduce the force that is  
88 exerted on the seed.

89           Integrating these functional hypotheses, we propose a multi-part model for the physical  
90 mechanisms underlying antitelechory in mucilaginous seeds (Figure 1, 2). Specifically, we work  
91 under the framework of the two major mechanistic processes, the ability of seeds to withstand

92 horizontal shear force and the amount of shear force the seeds experience as a result of fluid  
93 resistance. Contributing to the attachment potential is the amount of mucilage, the rate at which  
94 that mucilage expands, the rate it decays, and the seed size. Contributing to drag is seed size  
95 (including imbibed mucilage), the mucilage decay and expansion rate, and seed shape.  
96 Externally, the intensity of surface flow also contributes to potential for successful antitelechory.

97         In this study, we tested the proposed physical model with mucilaginous seeds of 52  
98 species in varying intensities of erosive surface flows. We examined how each seed trait relates  
99 to substrate attachment potential for the ability to withstand shear force and to projected area  
100 (largest cross-sectional area) and drag coefficient for fluid resistance. We characterized seed  
101 mass, seed mucilage mass, and two temporal aspects of mucilage quantity in water (i.e. speed of  
102 mucilage expansion and breakdown). After identifying useful predictors of dislodgement  
103 potential, we compared the marginal predictive utility of the functional assays to provide  
104 guidance on future functional investigations.

105

## 106 **Methods**

### 107 *Dislodgement resistance experiment*

108         We experimentally tested whether seed mucilage facilitates anchorage during erosive  
109 surface flow for 52 species of mucilaginous-seeded plants from 10 families (Table S1, Figure  
110 S1). The species were selected haphazardly based on availability from commercial seed sources,  
111 our field collections, or the USDA Germplasm Resources Information Network program  
112 (USDA-ARS, 2015). Preliminary experiments in the field (see supplement) suggested that seeds  
113 can remain stuck to inclined sandstone, vertical clay cliffs, and frequently flooded riverbanks  
114 during several rainstorms (Figure 3A, D-E). To mimic the erosive effect of surface flow during

115 these rainstorm events, we developed a simple laboratory assay that subjected anchored seeds to  
116 a range of surface flow rates that seeds may encounter in the field (Figure S2). Seeds were  
117 imbibed in water for at least one hour, during which the mucilage of most species was able to  
118 fully expand (the average time to full expansion was 32 minutes). We placed one seed of each  
119 species inside individual divots on the back side of each ceramic tile (10 × 10 cm Hudson  
120 Brilliant White Glossy Ceramic Wall Tile) in a predetermined randomized order, then allowed  
121 the seeds to dry overnight. To present different conditions, alternating tiles were oriented right  
122 side up or upside down. We attached each tile in its predetermined orientation to a 10.5 × 10.5 ×  
123 12.5 cm plastic flowerpot with the bottom cut out, which acted as a funnel, and mounted on a 45°  
124 incline < 15 cm below individual water faucets. We turned each faucet on to a constant flow rate  
125 between  $6.7 \times 10^{-5}$  -  $1.4 \times 10^{-2}$  L/s/cm. The flow from each faucet was measured at the beginning  
126 and end of each trial, as pressure changed based on other building users; the mean of the two  
127 values was recorded as the flow speed treatment. The trials began when water started flowing  
128 and ended after either six or seven days. Each tile was monitored continuously for the first 15  
129 minutes, on an hourly basis for the next five hours, and two to five times a day subsequently,  
130 during which we recorded the timing of each observed seed dislodgement. We used at most ten  
131 sinks simultaneously and ran the experiment over the span of two weeks for a total of 20 trials.  
132 One seed in one trial (*Leptosiphon* 'hybrid') was excluded due to a missing dislodgement time.

### 133 *Functional trait assays*

134 In order to evaluate our hypothesized mechanisms of antitelechory, we measured a  
135 variety of morphological and functional traits of seeds. We measured dry seed mass for each  
136 species by weighing several seeds together and taking the mean for a single seed; this  
137 measurement was repeated twice per species. For each species, we also estimated the individual



138 volume and mean projected area of four fully imbibed seeds for each species using a digital  
139 microscope (DinoCapture 2.0) by measuring the diameter of the three principal axes (see  
140 supplement). The dry dislodgement force was measured for 7-28 individual seeds/species using a  
141 modified method from Pan et al. (2021). We attached imbibed seeds to glass slides instead of  
142 adding water to dry seeds on petri dishes, which improved consistency and precision over our  
143 previous method. We also standardized the seed orientation, only pressing the Pesola spring  
144 scale perpendicularly against the long axis of the seed. Because the slipperiness of wet mucilage  
145 was not amenable to the same method, the dislodgement force of seeds when mucilage was wet  
146 was measured using a modified double-sided lever balance that pulled imbibed seeds apart from  
147 two pieces of filter paper (see supplement; Figure S3). For this assay, we measured each species  
148 three times, each time using five seeds.

149 We characterized the quantity of mucilage produced by different species and the temporal  
150 dynamics of mucilage quantity in water. For short term dynamics, we measured the mass of  
151 imbibed seeds of each species at roughly 0.5, 2, 8, 32, 120, 480, and 1200 minutes after wetting.  
152 We weighed four seeds at each time point, discarding seeds after weighing as their mucilage  
153 structure may have been damaged during handling. For each species at each time point  $t$ , we  
154 found the mean species mucilage mass ( $m$ ) by subtracting the mean species wet mass by the  
155 mean species dry seed mass. Then, using (1), modeled after Darcy's law of hydrodynamic flow  
156 (supplemental method for derivation), we estimated mucilage mass of a fully imbibed seed  
157 ( $m_{max}$ , which is functionally equivalent to mucilage mass after 1 hour for nearly all species) and  
158 the speed coefficient of mucilage secretion in  $s^{-1}$  ( $a$ ):

$$m(t) = m_{max} - m_{max}e^{-at} \quad (1)$$

159 We repeated the assay a few times for species which had large posterior credible intervals around  
160 the estimated parameters.

161 To characterize the mucilage decay over longer time periods, we weighed four different  
162 seeds every day for a week for each species. Twenty-eight seeds of each species were imbibed in  
163 40 mL of water at 1 °C to which we added two drops of 1% bleach to prevent seed germination  
164 and decomposition. We estimated the rate of mucilage dissolution with (2):

$$m(t) = m_{max}e^{-Dt} \quad (2)$$

165 where  $m(t)$  is the mass of mucilage at time  $t$ ,  $m_{max}$  is the maximum mucilage mass,  $D$  is the  
166 mucilage decay rate coefficient in days<sup>-1</sup>.

167 We further estimated a modified drag coefficient in water through a terminal velocity  
168 assay (Loudon & Zhang, 2002). In a 17 × 90 cm transparent cylinder filled to the brim with  
169 water at rest, we dropped imbibed seeds from the top and measured the time it took for each seed  
170 to travel 60 cm. We repeated this assay ten times for each species. All seeds reached terminal  
171 velocity within the first ten centimeters of dropping distance, hence they were measured from 20  
172 to 80 cm below the dropping point. From the equation for objects traveling at terminal velocity,  
173 we isolated an experimental constant ( $k_d$ ) that is in essence equivalent to the drag coefficient, but  
174 with the dependency on terminal velocity factored out (see supplement for derivation).

$$k_d = \frac{2g(m_{total} - \rho V_{total})}{\rho v^{(2+\beta_1)} A} \quad (3)$$

175 Here,  $g$  is the acceleration due to gravity,  $m_{total}$  is the mass of the seed with mucilage,  $\rho$  is the  
176 density of water,  $V_{total}$  is the volume of the imbibed seed with mucilage,  $\beta_1$  is a conversion  
177 constant that relate the drag coefficient to Reynolds number,  $A$  is the projected area, and  $v$  is the  
178 terminal velocity of the seed. All parameters that we did not directly measure ( $m_{max}$ ,  $a$ ,  $D$ , and  $k_d$ )

179 were estimated using individual species linear or non-linear models with moderately regularizing  
180 priors.

### 181 *Components of antitelechory*

182 All continuous variables besides  $D$ ,  $k_d$ , seed mass, and time to dislodgement were log  
183 transformed to improve linearity and all continuous predictors were standardized as Z-scores.  
184 Unsupported interactions were dropped, and the models refitted. All statistical analyses were  
185 conducted using R (version 4.0.5; R Core Team 2020). All models were constructed using the  
186 Stan interface package *brms* (Bürkner, 2017, 2018) or *rstanarm* (Goodrich et al., 2020). All  
187 cross-validations were done using the package *loo* (Vehtari et al., 2017, 2019).

188 We first characterized the extent to which time to dislodgement was affected by a seed's  
189 attachment to substrate and the degree of drag it experienced. We analyzed the time to  
190 dislodgement of each seed in a log-normal accelerated failure time (AFT) multilevel model ( $n =$   
191 1039 seeds). Tile orientation, flow speed, wet dislodgement force, dry dislodgement force, mean  
192 projected area, and the experimental drag constant  $k_d$  were included as fixed effects. Flow speed  
193 was allowed to interact with wet and dry dislodgement force, mean projected area, and  $k_d$  to test  
194 whether these processes have different effect sizes in different flow intensities. We also included  
195 mucilage decay  $D$  and mucilage wetting speed  $a$  as fixed effects and allowed them to interact  
196 with force and  $k_d$  as the temporally variable quantity of mucilage might moderate the effect of  
197 force and  $k_d$ . To take into account the uncertainty in estimated values of  $k_d$ ,  $a$ , and  $D$ , we  
198 performed multiple imputations at the species level using standard errors associated with each  
199 measurement. Individual tiles and species were included as random group intercepts. In order to  
200 account for some unmeasured variables shared among close relatives that affect the results, we  
201 performed a phylogenetic correction using a Brownian correlation structure. We constructed this

202 matrix from a species level tree pruned from a synthesis of the most recent mega-phylogenies  
203 (Zanne, et al. 2014, Smith & Brown, 2018, *package: V.PhyloMaker* Jin & Qian, 2019).  
204 Unresolved species were assigned as polytomies at the genus basal node (Qian & Jin, 2016).  $R^2$   
205 was computed using equation three from Gelman et al. (2019) with and without group-level  
206 effects.

### 207 *Contributions of seed and mucilage traits to components of antitelechory*

208 To understand how seed and mucilage traits contribute to mechanistic component of fluid  
209 resistance and anchorage ability, we analyzed mean species dry dislodgement force, wet  
210 dislodgement force, mean projected area, and  $k_d$  in four linear models as the response variable ( $n$   
211 = 52). Dry seed mass and max mucilage mass  $m_{max}$  were included in all models as fixed effects.  
212 Mucilage decay and an interaction with  $m_{max}$  were included in the models for wet dislodgement  
213 force and  $k_d$ . Phylogenetic relationship was specified in all models as a correlation matrix.  
214 Measurement error multiple imputations were again conducted for variables we did not directly  
215 measure ( $m_{max}$ ,  $a$ ,  $D$ , and  $k_d$ ).

### 216 *Structural equation model*

217 We performed a piecewise confirmatory path analysis to characterize the relative  
218 magnitude and direction of how seed functional traits mechanistically contributed to  
219 antitelechory. Our structural equation model (SEM) was composed of five sub-models: four  
220 linear models for 1) wet dislodgement force, 2) dry dislodgement force, 3) mean projected area,  
221 and 4)  $k_d$  that followed the same model structure as above, in addition to 5) an average species  
222 AFT model. We condensed individual seed level time to dislodgement into mean time to  
223 dislodgement for each species as the destructive nature of our trait assays necessitated that we  
224 only had mean species level trait data. Mean time to dislodgement for each species at mean flow

225 speed was predicted from an AFT multilevel model as before, following the same model  
226 structure, but with only flow speed and tile orientation as fixed effects. Due to computational  
227 limitations, we limited multiple imputations to predicted dislodgement time and  $k_d$ . Plausible  
228 alternative paths were checked by including each path in a new model and comparing the leave  
229 one out information criterion (*LOOIC*). Plausible alternative paths were rejected when the  
230 decrease in *LOOIC* was  $< 2$ .

### 231 *Marginal utility of functional assays*

232 Finally, in order to determine what traits are most important to measure if time and  
233 resources are limited (for instance, in broad community functional trait studies), we characterized  
234 the marginal predictive value of different seed functional traits in understanding antitelechory.  
235 Based on the results of our path analysis and regression models, we selected five useful seed  
236 traits (mean projected seed area, seed mass,  $k_d$ , wet, and dry force) for forward model selection.  
237 We began with an AFT multilevel model of individual seed erosion time as before but with only  
238 flow speed and tile orientation as fixed effects. Variables were selected based on grouped-13-  
239 fold cross-validation information criterion; each refit of the model left four species out of sample  
240 at a time (Roberts et al., 2017).

241

## 242 **Results**

### 243 *Components of antitelechory*

244 We found strong evidence that wet and dry dislodgement force and drag force were  
245 mechanistically driving the time to dislodgement (*Conditional*  $R^2 = 0.71$ , 95% *Credible interval*  
246 ( $CI_{95}$ ) = [0.68, 1.0], *Marginal*  $R^2 = 0.61$ ,  $CI_{95} = [0.53, 1.0]$ ). Seeds on average remained on tiles  
247 for 5.3 days, although the time to dislodgement was highly variable among flow rates and among

248 species. A standard deviation in the time to dislodgement spanned over two orders of  
249 magnitudes. The ability for seeds to anchor to substrates substantially increased resistance to  
250 dislodgement under surface flow (Figure 4A-B). One *SD* increase in log dry dislodgement and  
251 log wet dislodgement force of seeds was associated with a 2900% ( $\beta = 3.4 \pm 0.74$ ,  $CI_{95} = [1.9,$   
252 4.8]) and 630% increase in time to dislodgement respectively ( $\beta = 1.8 \pm 0.68$ ,  $CI_{95} = [0.50, 3.2]$ ).  
253 Flow intensity did not affect the efficacy of either dry ( $\beta = -0.21 \pm 0.26$ ,  $CI_{95} = [-0.74, 0.30]$ ) or  
254 wet force ( $\beta = 0.32 \pm 0.27$ ,  $CI_{95} = [-0.21, 0.84]$ ).

255 Variables that contributed to higher drag decreased time to dislodgement. The negative  
256 effect of the modified drag coefficient was strongest at lower flow intensities ( $\beta_{interaction} = 0.41 \pm$   
257 0.19,  $CI_{95} = [0.057, 0.79]$ ; Figure 5). At the 25<sup>th</sup> and 75<sup>th</sup> percentile flow speed, an *SD* higher  $k_d$   
258 was associated with an 84% and 44% reduction in time to dislodgement respectively ( $\beta_{kd} = -1.2 \pm$   
259 0.65,  $CI_{95} = [-2.5, 0.084]$ ). Flow speed had a negative effect on time to dislodgement regardless  
260 of  $k_d$  ( $\beta_{flow} = -1.8 \pm 0.32$ ,  $CI_{95} = [-2.4, -1.1]$ ). An *SD* higher flow speed reduced time to  
261 dislodgement by 83% when  $k_d$  was held at average. Mean projected seed area did not have a  
262 significant effect on time to dislodgement ( $\beta = -0.57 \pm 0.78$ ,  $CI_{95} = [-2.1, 0.96]$ ) or interact with  
263 flow speed ( $\beta = -0.40 \pm 0.27$ ,  $CI_{95} = [-0.92, 0.14]$ ). In contrast to our hypotheses, neither wetting  
264 speed ( $a$ ) or mucilage decay ( $D$ ) affected time to dislodgement ( $\beta_D = -0.55 \pm 0.72$ ,  $CI_{95D} = [-1.9,$   
265 0.96];  $\beta_a = 0.49 \pm 0.83$ ,  $CI_{95a} = [-1.2, 2.1]$ ), or interacted significantly with wet force ( $\beta_D = 0.55 \pm$   
266 1.1,  $CI_{95D} = [-1.8, 2.4]$ ;  $\beta_a = -0.50 \pm 0.93$ ,  $CI_{95a} = [-2.3, 1.4]$ ), dry force ( $\beta_D = 0.054 \pm 1.1$ ,  $CI_{95D} =$   
267  $[-2.2, 2.3]$ ;  $\beta_a = 0.44 \pm 1.0$ ,  $CI_{95a} = [-1.5, 2.4]$ ), or the drag coefficient,  $k_d$  ( $\beta_D = 0.82 \pm 1.7$ ,  $CI_{95D} =$   
268  $[-3.9, 2.9]$ ;  $\beta_a = 0.077 \pm 0.83$ ,  $CI_{95a} = [-1.6, 1.6]$ ).

269           Some seeds germinated during the trial. Dislodgement of the seedling post-germination  
270 occurred in 1% of seeds (11/1039) and a reanalysis, counting these germinated seeds as not  
271 dislodged, yielded results that were within rounding error from those presented here.

272 *Contributions of seed and mucilage traits to dislodgement force*

273           Mucilaginous seeds anchored strongly to substrates, both after a wetting-drying cycle  
274 (dry attachment) and while mucilage was fully imbibed (wet attachment). Although the method  
275 of measurement was different, the dislodgement force greatly depended on the hydration status  
276 of the mucilage. The dislodgement force of mucilage to glass slides when dry averaged 0.13 N,  
277 while the dislodgement force of wet mucilage to filter paper averaged 0.0043 N. The amount of  
278 mucilage that seeds produced correlated well with the strength of substrate anchorage for both  
279 when the mucilage was dry ( $\beta = 2.3 \pm 0.24$ ,  $CI_{95} = [-1.9, 2.8]$ ) and wet ( $\beta = 0.86 \pm 0.13$ ,  $CI_{95} =$   
280  $[0.61, 1.1]$ ) (Figure 4C-D). A one *SD* increase in log mucilage mass was associated with a 900%  
281 and 140% increase in dry and wet dislodgement force respectively. Higher seed mass was  
282 significantly correlated with lower dry dislodgement force ( $\beta = -0.72 \pm 0.30$ ,  $CI_{95} = [-1.3, -0.14]$ ),  
283 but not wet dislodgement force ( $\beta = -0.023 \pm 0.15$ ,  $CI_{95} = [-0.33, 0.25]$ ). Faster mucilage decay  
284 was positively correlated with higher wet dislodgement force ( $\beta = 0.65 \pm 0.17$ ,  $CI_{95} = [0.38, 1.0]$ )  
285 and its effect did not depend on the amount of mucilage ( $\beta = -0.17 \pm 0.17$ ,  $CI_{95} = [-0.52, 0.15]$ ).  
286 A one *SD* increase in the rate of mucilage decay corresponded to a 92% higher wet dislodgement  
287 force. Together, these variables accounted for most of the variation in dry dislodgement force ( $R^2$   
288  $= 0.71$ ,  $CI_{95} = [0.63, 0.77]$ ) and wet dislodgement force ( $R^2 = 0.76$ ,  $CI_{95} = [0.65, 0.85]$ ).

289 *Contributions of seed and mucilage traits to drag coefficient and projected area*

290           Mean projected area of imbibed seeds was significantly associated with higher amount of  
291 mucilage produced, independent of seed size. A one *SD* increase in log mucilage mass was

292 associated with 90% higher mean projected area ( $\beta = 0.64 \pm 0.068$ ,  $CI_{95} = [0.51, 0.77]$ ). Seed  
293 mass was correlated positively with mean projected area, but the association was only marginally  
294 significant ( $\beta = 0.15 \pm 0.086$ ,  $CI_{95} = [-0.020, 0.32]$ ). Together, both variables explained most  
295 variation in mean projected area ( $R^2 = 0.89$ ,  $CI_{95} = [0.84, 0.92]$ ). Our modified drag coefficient  $k_d$   
296 averaged 0.9, with some estimates extending into the negative domain as seed volumes were  
297 likely generally overestimated. Seed mass ( $\beta = 0.34 \pm 0.49$ ,  $CI_{95} = [-0.60, 1.3]$ ), mucilage mass  
298 ( $\beta = 0.19 \pm 0.38$ ,  $CI_{95} = [-0.57, 0.94]$ ), the rate of mucilage decay ( $\beta = 0.00070 \pm 0.0078$ ,  $CI_{95} =$   
299  $[-0.015, 0.016]$ ), and an interaction between the rate of mucilage decay and mucilage mass did  
300 not explain  $k_d$  ( $\beta = -0.015 \pm 0.015$ ,  $CI_{95} = [-0.043, 0.014]$ ).

### 301 *Structural equation model*

302 The best SEM is shown in Figure 6A. We found strong evidence that higher mucilage  
303 mass indirectly increased species' antitelechorous potential through increasing dry and wet  
304 dislodgement force, rather than directly affecting time to dislodgement ( $\Delta LOOIC = 16$ ). Through  
305 both increasing dry and wet dislodgement force, a one *SD* increase in log mucilage mass  
306 corresponded to a staggering 280-times increase in time to dislodgement, an effect which far  
307 overshadowed other seed traits in relative importance (Figure 6B). Both mucilage wetting speed  
308 and the rate of mucilage decay also had a positive indirect effect on time to dislodgement  
309 through increasing wet dislodgement force, although the magnitude of their effect was  
310 comparatively minor (<10% the effect size of mucilage mass). Holding mucilage mass constant,  
311 seeds with a higher mass had a large negative indirect association with time to dislodgement  
312 through lower dry dislodgement force. A one *SD* higher seed mass was associated with a 66%  
313 reduction in antitelechorous potential through lower dry dislodgement force. The best model also  
314 included a direct path from seed mass to time to dislodgement ( $\Delta LOOIC = 22$ ), but the weak



315 negative effect was not distinguishable from zero ( $\beta = -0.19 \pm 0.15$ ,  $CI_{95} = [-0.49, 0.10]$ ). At  
316 mean flow speed, the modified drag coefficient had a significant negative effect on time to  
317 dislodgement in the SEM, roughly equivalent in magnitude as wet dislodgement force. However,  
318 the modified drag coefficient was not affected by the amount of mucilage of the species. In  
319 contrast, while seed mucilage mass substantially increased mean projected seed area, mucilage  
320 mass ultimately did not indirectly reduce time to erosion to because the effect of mean projected  
321 seed area is not distinguishable from zero.

### 322 *Marginal utility of functional assays*

323 Stepwise cross-validation revealed that including dry dislodgement force was sufficient  
324 to achieve roughly three-quarters of the predictive performance of the best model containing dry  
325 dislodgement force,  $k_d$ , wet dislodgement force, and mean projected area (Figure S4). Including  
326 the next best variable  $k_d$  brings the model's predictive performance up to 93% of the best model.

### 327 **Discussion**

328 Through explicitly testing our model of the physical mechanisms at play, we  
329 demonstrated that mucilage mass was by far the most important trait that affects mucilage-  
330 mediated antitelechory and that it acts by increasing the force necessary for dislodgement. Thus,  
331 we suggest dry dislodgement force assay as a simple proxy for mucilage-mediated antitelechory  
332 in future studies, as this measurement had approximately 75% of the predictive power of the best  
333 model. Our mechanistic model, based on dislodgement force and fluid resistance, explained time  
334 to dislodgement extremely well ( $R^2 = 0.71$ ). Thus, this model (Figure 6A) is a useful heuristic to  
335 employ in further investigations of substrate attachment. We do not mean to suggest that other  
336 unmeasured variables (e.g. seed surface characteristics, mucilage composition, and mucilage  
337 structure) do not contribute meaningfully; rather, the basic measurements we performed are

338 sufficient to capture the vast majority of the relative antitelechory potential of across a diversity  
339 of plants.

340 *What drives dislodgement force?*

341 Dislodgement force, especially that of dried mucilage was the most important predictor  
342 of erosion resistance (Dried mucilage: partial  $R^2 = 0.26$ ,  $CI_{95} = [0.00012, 0.50]$ , Wet mucilage:  
343 partial  $R^2 = 0.076$ ,  $CI_{95} = [-0.094, 0.31]$ ). It correlated strongly with mucilage mass, a result we  
344 also found with a different set of species and a slightly different dislodgement assay (Pan et al.,  
345 2021), suggesting that increased dislodgement force can be driven by simply increasing mucilage  
346 production. Mucilage mass may be quite variable among close relatives (Table S2). A  
347 particularly striking example occurred within *Dracocephalum* (Lamiaceae). An ornamental  
348 variety of *D. moldavica* had 39 mg of mucilage in a large envelope around the nutlet and a  
349 dislodgement force of  $> 2$  N, while the similarly sized nutlets of *D. parviflorum* had  $< 1$  mg of  
350 mucilage localized in small projections at one end, and an unmeasurably small dislodgement  
351 force (scored as 0.0098 N in this analysis).

352 However, considering mucilage mass as the primary predictor is overly simplistic; other  
353 factors, probably composition and seed shape, are likely to contribute to dry dislodgement force.  
354 The pectic mucilage of *Linum* spp., rich in rhamnogalacturonan and arabinoxylan with unusual  
355 side group substitutions, provides a good example (Naran et al., 2008). Dry and wet  
356 dislodgement force of Linaceae was consistently underpredicted by mucilage mass, suggesting  
357 that this mucilage composition may be stronger than other types (also suggested by Kreitschitz et  
358 al., 2021a). In contrast, seeds of species of Polemoniaceae were more weakly attached than  
359 expected given their mucilage mass; their mucilage composition and primary function of  
360 mucilage in nature is thus far unknown but deserves more investigation. We have found that it

361 provides a defensive benefit to several species in the family (LoPresti et al., 2019, Pan et al.,  
362 2021), though it was not as protective as mucilage of other families in those studies as well.

363 The substrate that seeds attach to is also important. We measured dried mucilage  
364 dislodgement force on glass microscope slides for maximum replicability. However, when  
365 testing substrates for this experiment, we found that seeds that were attached to increasingly finer  
366 grit sandpaper dislodged with less force (unpublished data). Fortunately, the glass slide assay  
367 was a good proxy for the performance on the tiles, as evidenced by its high explanatory power,  
368 although there could be realistic substrates where it is far less applicable. Drying speed also  
369 alters dislodgement force and mucilage structure (personal observations), though it is unclear  
370 how this interacts with substrate, and therefore deserving of increased scrutiny. How mucilage  
371 mass, seed shape, and mucilage composition change dislodgement force across substrate types  
372 and environmental conditions are entirely unexplored questions that could increase ecological  
373 realism in future studies of mucilage-mediated antitelechory.

374 *Why was drag a less important predictor?*

375 Surprisingly, the drag coefficient, despite being a significant effect, was a relatively poor  
376 predictor of time to dislodgement in our study (partial  $R^2 = 0.085$ ,  $CI_{95} = [-0.044, 0.27]$ ). There  
377 are both theoretical and methodological explanations for this result. It is likely that for most  
378 seeds in the most realistic erosive conditions (i.e. not our highest flow rates), drag is not  
379 sufficient to overcome the attachment potential to the substrate. Our estimates, derived from  
380 seeds falling at terminal velocity in a water-filled cylinder, also may not properly reflect the flow  
381 regime or mucilage envelope dynamics during erosive conditions. Additionally, values were  
382 probably inaccurate, though we believe that they reasonably reflect relative species differences in  
383 this study. The mucilage envelope probably deforms to a much higher extent in higher flow rates

384 and outer layers may shear off (Figure 3B-C), thereby reducing drag below our estimates.  
385 Further, in higher and more turbulent flow regimes, theory predicts the drag coefficient rapidly  
386 decays (White, 1991), thus contributing a lesser extent to the overall drag. As such, that the  
387 effect of the modified drag coefficient was strongest at lower flow rates was hardly surprising.  
388 Deeper investigation into this matter is beyond the scope of this study and more complex drag  
389 dynamics are surely at play than were considered here. For instance, in field pilot trials, the  
390 attached seeds caught debris during times of surface flow which surely affected the seeds' fluid  
391 resistance (Figure 3D-E). Finally, the poor explanatory performance of mean projected seed area  
392 might be attributed to similar causes. In addition, we noticed that water rarely flowed over the  
393 top of larger seeds except in higher surface flow conditions (Figure 3F). Thus, only a fraction of  
394 the projected area was truly interacting with water.

395 *Why were mucilage decay and expansion rate poor predictors?*

396         Given that the attachment potential of wet and dry mucilage differed so greatly, and that  
397 mucilage mass was an important predictor of attachment potential (Pan et al., 2021), we  
398 hypothesized that the time the mucilage envelope takes to expand and the rate of decay when  
399 submerged would be important components of our model. Yet, both were poor predictors of time  
400 to dislodgement (partial  $R^2_a = 0.042$ ,  $CI_{95a} = [-0.064, 0.18]$ ; partial  $R^2_D = 0.043$ ,  $CI_{95D} = [-0.058,$   
401  $0.18]$ ). Each of these metrics varied greatly between species (Table S2). The mucilage of  
402 *Prunella grandiflora* (Lamiaceae) decayed far more quickly (18%/day) than any other species  
403 (mean: 5%/day), and some species had no measurable decay during the week-long trial. Time to  
404 95% mucilage expansion varied greatly as well, from just three minutes in *Lobularia maritima*  
405 (Brassicaceae) to 5.5 hours in *Linum grandiflorum* (Linaceae).

406           We had hypothesized that mucilage decay in water would reduce wet dislodgement force  
407 and drag, chipping away the mucilage anchorage over time. However, the rate of mucilage  
408 dissolution appeared to be generally sufficiently low as to be of little importance within the span  
409 of one week. Though, because seeds often need to withstand erosive forces sporadically over  
410 months in nature (during which time the mucilage may be fed on by microbes or small  
411 invertebrates: Buse & Filser, 2014) before an adequate growing condition arrives, the  
412 compounding mucilage decay may take on a greater importance over longer time scales and in  
413 natural settings.

414           Similarly, we had hypothesized that mucilage expansion rate would affect antitelechorous  
415 potential by moderating the switch between the much stronger dry dislodgement force and the  
416 much weaker wet dislodgement force. However, our results suggest that either dry force or wet  
417 force was likely sufficient to anchor most species against lower flow rates. In an additional  
418 experiment, seeds with wet mucilage that were not allowed time to dry remained equally  
419 resistant to erosion as seeds that were and the length of mucilage drying time did not explain  
420 time to erosion (see supplement). Considering that mucilage expansion speed may increase wet  
421 dislodgement force (Figure 6A), its possible role in facilitating more rapid onset of mucilage-  
422 mediated antitelechory, even in situations of limited moisture exposure time (e.g. morning dew),  
423 may be critical in nature, but is unevaluated in this study.

#### 424 *Potential adaptive significance*

425           In conditions where antitelechory is adaptive (Ellner & Schmid, 1981), seeds need to  
426 anchor using the mucilage layer only until they germinate and begin root growth. Thus, time to  
427 erosion ( $t_E$ ) for a given seed can only be understood ultimately in light of its time to germination  
428 ( $t_G$ ), with success defined as:

$$\frac{t_E}{t_G} > 1$$

429 Accordingly, for species that germinate quickly, lower anchorage ability need not be an  
430 indictment of the ability of the species to colonize highly erosive environments or the efficacy of  
431 the species' antitelechorous mechanisms. Similarly, for species with a wider germination  
432 window, effective antitelechory may require better anchorage ability.

433 Antitelechory, though probably an important function of mucilage in nature (Garcia-  
434 Fayos et al., 2013, Engelbrecht et al., 2014), also cannot be understood in isolation, as seed  
435 mucilage is a highly multi-functional trait. Some of the characteristics that we measured here  
436 have been demonstrated to contribute to other beneficial functions of mucilage (e.g. mucilage  
437 mass correlates with germination under water stress conditions: Teixeira et al., 2020; dry  
438 dislodgement force correlates with resistance to granivory: Pan et al., 2021). Additionally, it is  
439 reasonable, though as of yet untested, that these same traits contribute more to other functions:  
440 wet dislodgement force probably drives epizoochorous dispersal (Ryding, 2001), a slower  
441 mucilage decay rate may increase survival of seeds through the gut of herbivores (Kreitschitz et  
442 al. 2021a), and faster imbibition rate could lead to better DNA repair during brief wetting periods  
443 (Huang et al., 2008).

444 To understand the drivers of mucilage evolution would require a more comprehensive  
445 sampling of species and more extensive measurement of traits that uniquely account for the  
446 many alternative functional hypotheses. Increasingly finer mechanistic understanding of the seed  
447 and mucilage traits that predict specific ecological functions would create more opportunities for  
448 teasing apart the evolutionary drivers of those traits, and myxodiaspory more broadly. Short of  
449 experimentally testing real time mucilage evolution, such an effort would be necessary for causal  
450 inference of mucilage evolution and selection pressures.

451

## 452 **Conclusion**

453           Across a wide diversity of species, attachment of seeds to substrates with seed mucilage  
454 mediates antitelechory by increasing surface dislodgement force, facilitating seed anchorage in  
455 highly erosive environments. Mucilage binding to surfaces was a highly effective form of  
456 antitelechory regardless of its hydration status. How this antitelechory potential ultimately  
457 translates to the more ecologically meaningful seedling establishment in erosive environments  
458 probably depends greatly on both the speed of germination and the local surface flow intensity  
459 and represents an important next step in these investigations.

460           Our investigation into the mechanistic underpinnings demonstrated the relationship  
461 between mucilage mass and dislodgement force as pivotal in understanding the mechanistic basis  
462 of mucilage-mediated antitelechory. In contrast, our functional hypotheses about mucilage decay  
463 rate, expansion rate, and drag were largely unsupported. Nevertheless, the mucilage assays used  
464 and developed in this study should be extremely useful for future studies delving into different  
465 mucilage functional investigations. We specifically designed the assays to be cheap, simple, and  
466 replicable. In particular, in addition to its utility predicting defense against granivores (Pan et al.,  
467 2021), dry dislodgement force is a quick and informative assay to make when one seeks to obtain  
468 a rough heuristic of antitelechorous potential across a wide range of species.

469

## **Acknowledgements**

The USDA ARS GRIN program provided some of the seeds and were very prompt and helpful in coordination and shipment; special thanks to Jeffrey Carstens, Tiffany Fields, and Alex Sanchez. The computing for this project was performed at the High Performance

Computing Center at Oklahoma State University supported in part through the National Science Foundation grant OAC-1531128. We thank Jesse Schafer, head of operations, who was tremendously helpful in speeding up our script. We also thank Bill Henley and Andrew Doust for sharing their lab space for us to run our experiment, John Pan for providing technical guidance on fluid mechanics, the Wetzel lab and Rick Karban for providing manuscript feedback, and Mark Fishbein for both sharing sinks and commenting on our manuscript. VSP is supported by the Early Start fellowship from Michigan State University. EFL is supported by startup funds from Oklahoma State University.

## References

- Aerts R, Maes W, November E, Behailu M, Poesen J, Deckers J, Hermy M, Muys B. 2006. Surface runoff and seed trapping efficiency of shrubs in a regenerating semiarid woodland in northern Ethiopia. *CATENA* 65: 61–70.
- Bell T, Freckleton RP, Lewis OT. 2006. Plant pathogens drive density-dependent seedling mortality in a tropical tree. *Ecology Letters* 9: 569–574.
- Bürkner P-C. 2017. brms: An R Package for Bayesian Multilevel Models Using Stan. *Journal of Statistical Software* 80: 1–28.
- Bürkner P-C. 2018. Advanced Bayesian Multilevel Modeling with the R Package brms. *The R Journal* 10: 395–411.
- Buse T, Filser J. 2014. Mucilaginous seeds and algal diets attract soil Collembola in preference tests. *European Journal of Soil Biology* 65: 1–6.
- Cowley JM, Burton RA. 2021. The goo-d stuff: *Plantago* as a myxospermous model with modern utility. *New Phytologist* 229: 1917–1923.



- Cowley JM, O'Donovan LA, Burton RA. 2021. The composition of Australian *Plantago* seeds highlights their potential as nutritionally-rich functional food ingredients. *Scientific Reports* 11: 12692.
- Ellner S, Shmida A. 1981. Why are adaptations for long-range seed dispersal rare in desert plants? *Oecologia* 51: 133–144.
- Engelbrecht M, Bochet E, García-Fayos P. 2014. Mucilage secretion: an adaptive mechanism to reduce seed removal by soil erosion?: Mucilage Secretion and Seed Removal. *Biological Journal of the Linnean Society* 111: 241–251.
- Fuller PJ, Hay ME. 1983. Is Glue Production by Seeds of *Salvia Columbariae* a Deterrent to Desert Granivores? *Ecology* 64: 960–963.
- Goodrich B, Gabry J, Ali I, Brilleman S (2020). “rstanarm: Bayesian applied regression modeling via Stan.” R package version 2.21.1, <https://mc-stan.org/rstanarm>.
- García-Fayos P, Engelbrecht M, Bochet E. 2013. Post-dispersal seed anchorage to soil in semiarid plant communities, a test of the hypothesis of Ellner and Shmida. *Plant Ecology* 214: 941–952.
- Gelman A, Goodrich B, Gabry J, Vehtari A. 2019. R-squared for Bayesian Regression Models. *The American Statistician* 73: 307–309.
- Grubert M. 1974. Studies on the distribution of myxospermy among seeds and fruits of Angiospermae and its ecological importance. *Acta Biologica Venezuelica* 8: 315–551.
- Grubert M. 1981. Mucilage Or Gum in Seeds and Fruits of Angiosperms: A Review. Minerva-Publikation.
- Han L, Jiao J, Jia Y, Wang N, Lei D, Li L. 2011. Seed removal on loess slopes in relation to runoff and sediment yield. *CATENA* 85: 12–21.

- Huang Z, Boubriak I, Osborne DJ, Dong M, Gutterman Y. 2008. Possible Role of Pectin-containing Mucilage and Dew in Repairing Embryo DNA of Seeds Adapted to Desert Conditions. *Annals of Botany* 101: 277–283.
- Huang D, Wang C, Yuan J, Cao J, Lan H. 2015. Differentiation of the seed coat and composition of the mucilage of *Lepidium perfoliatum* L.: a desert annual with typical myxospermy. *Acta Biochimica et Biophysica Sinica* 47: 775–787.
- Inceer H. 2011. Achene slime content in some taxa of *Matricaria* L. (Asteraceae). *Acta Botanica Croatica* 70.
- Jin Y, Qian H. 2019. V.PhyloMaker: an R package that can generate very large phylogenies for vascular plants. *Ecography* 42: 1353–1359.
- Kim TN, Underwood N. 2015. Plant neighborhood effects on herbivory: damage is both density and frequency dependent. *Ecology* 96: 1431–1437.
- Kreitschitz A, Kovalev A, Gorb SN. 2015. Slipping vs sticking: Water-dependent adhesive and frictional properties of *Linum usitatissimum* L. seed mucilaginous envelope and its biological significance. *Acta Biomaterialia* 17: 152–159.
- Kreitschitz A, Gorb SN. 2018. The micro- and nanoscale spatial architecture of the seed mucilage—Comparative study of selected plant species. *PLOS ONE* 13: e0200522.
- Kreitschitz A, Haase E, Gorb SN. 2021a. The role of mucilage envelope in the endozoochory of selected plant taxa. *The Science of Nature* 108: 2.
- Kreitschitz A, Kovalev A, Gorb SN. 2021b. Plant Seed Mucilage as a Glue: Adhesive Properties of Hydrated and Dried-in-Contact Seed Mucilage of Five Plant Species. *International Journal of Molecular Sciences* 22: 1443.

- Kreitschitz A, Vallès J. 2007. Achene morphology and slime structure in some taxa of *Artemisia* L. and *Neopallasia* L. (Asteraceae). *Flora - Morphology, Distribution, Functional Ecology of Plants* 202: 570–580.
- LoPresti EF, Pan V, Goidell J, Weber MG, Karban R. 2019. Mucilage-bound sand reduces seed predation by ants but not by reducing apparency: a field test of 53 plant species. *Ecology* 100: e02809.
- Loudon C, Zhang J. 2002. Measuring drag without a force transducer: a terminal velocity assay. *Functional Ecology* 16: 268–272.
- Mennan H, Zandstra BH. 2006. The Effects of Depth and Duration of Seed Burial on Viability, Dormancy, Germination, and Emergence of Ivyleaf Speedwell (*Veronica hederifolia*). *Weed Technology* 20: 438–444.
- Naran R, Chen G, Carpita NC. 2008. Novel Rhamnogalacturonan I and Arabinoxylan Polysaccharides of Flax Seed Mucilage. *Plant Physiology* 148: 132–141.
- North HM, Berger A, Saez-Aguayo S, Ralet M-C. 2014. Understanding polysaccharide production and properties using seed coat mutants: future perspectives for the exploitation of natural variants. *Annals of Botany* 114: 1251–1263.
- Pan VS, McMunn M, Karban R, Goidell J, Weber MG, LoPresti EF. Mucilage-binding to ground protects seeds of many plants from harvester ants: a functional investigation. *Functional Ecology* In press.
- Poulain D, Botran L, North HM, Ralet M-C. 2019. Composition and physicochemical properties of outer mucilage from seeds of *Arabidopsis* natural accessions. *AoB PLANTS* 11.

- Qian H, Jin Y. 2016. An updated megaphylogeny of plants, a tool for generating plant phylogenies and an analysis of phylogenetic community structure. *Journal of Plant Ecology* 9: 233–239.
- Qiu Y-L, Li L, Wang B, Xue J-Y, Hendry TA, Li R-Q, Brown JW, Liu Y, Hudson GT, Chen Z-D. 2010. Angiosperm phylogeny inferred from sequences of four mitochondrial genes. *Journal of Systematics and Evolution* 48: 391–425.
- R Core Team. 2020. *R: A language and environment for statistical computing*. Vienna, Austria: R Foundation for Statistical Computing.
- Roberts DR, Bahn V, Ciuti S, Boyce MS, Elith J, Guillera-Arroita G, Hauenstein S, Lahoz-Monfort JJ, Schröder B, Thuiller W, *et al.* 2017. Cross-validation strategies for data with temporal, spatial, hierarchical, or phylogenetic structure. *Ecography* 40: 913–929.
- de Rouw A, Ribolzi O, Douillet M, Tjantahosong H, Soulileuth B. 2018. Weed seed dispersal via runoff water and eroded soil. *Agriculture, Ecosystems & Environment* 265: 488–502.
- Smith SA, Brown JW. 2018. Constructing a broadly inclusive seed plant phylogeny. *American Journal of Botany* 105: 302–314.
- Teixeira A, Iannetta P, Binnie K, Valentine TA, Toorop P. 2020. Myxospermous seed-mucilage quantity correlates with environmental gradients indicative of water-deficit stress: *Plantago* species as a model. *Plant and Soil* 446: 343–356.
- USDA Agricultural Research Service. (2015). Germplasm Resources Information Network (GRIN). Ag Data Commons. Accessed 2021-02-09.
- Vehtari A, Gabry J, Magnusson M, Yao Y, Gelman A. 2019. Efficient LOO-CV and WAIC for Bayesian models — loo-package.

- Vehtari A, Gelman A, Gabry J. 2017. Practical Bayesian model evaluation using leave-one-out cross-validation and WAIC. *Statistics and Computing* 27: 1413–1432.
- Veiga-Barbosa L, Pérez-García F, Veiga-Barbosa L, Pérez-García F. 2014. Germination of mucilaginous seeds of *Plantago albicans* (Plantaginaceae): effects of temperature, light, pre-sowing treatments, osmotic stress and salinity. *Australian Journal of Botany* 62: 141–149.
- Vertucci CW. 1989. The Kinetics of Seed Imbibition: Controlling Factors and Relevance to Seedling Vigor. In: Seed Moisture. John Wiley & Sons, Ltd, 93–115.
- Villellas J, García MB. 2013. The role of the tolerance–fecundity trade-off in maintaining intraspecific seed trait variation in a widespread dimorphic herb. *Plant Biology* 15: 899–909.
- Viudes S, Burlat V, Dunand C. 2020. Seed mucilage evolution: Diverse molecular mechanisms generate versatile ecological functions for particular environments. *Plant, Cell & Environment* 43: 2857–2870.
- Western TL. 2012. The sticky tale of seed coat mucilages: production, genetics, and role in seed germination and dispersal. *Seed Science Research* 22: 1–25.
- White FM. 1991. *Viscous Fluid Flow*. McGraw-Hill.
- Zanne AE, Tank DC, Cornwell WK, Eastman JM, Smith SA, FitzJohn RG, McGlenn DJ, O’Meara BC, Moles AT, Reich PB, *et al.* 2014. Three keys to the radiation of angiosperms into freezing environments. *Nature* 506: 89–92.
- Zhou Z, Xing J, Zhao J, Liu L, Gu L, Lan H. 2021. The ecological roles of seed mucilage on germination of *Lepidium perfoliatum*, a desert herb with typical myxospermy in Xinjiang. *Plant Growth Regulation* In press.

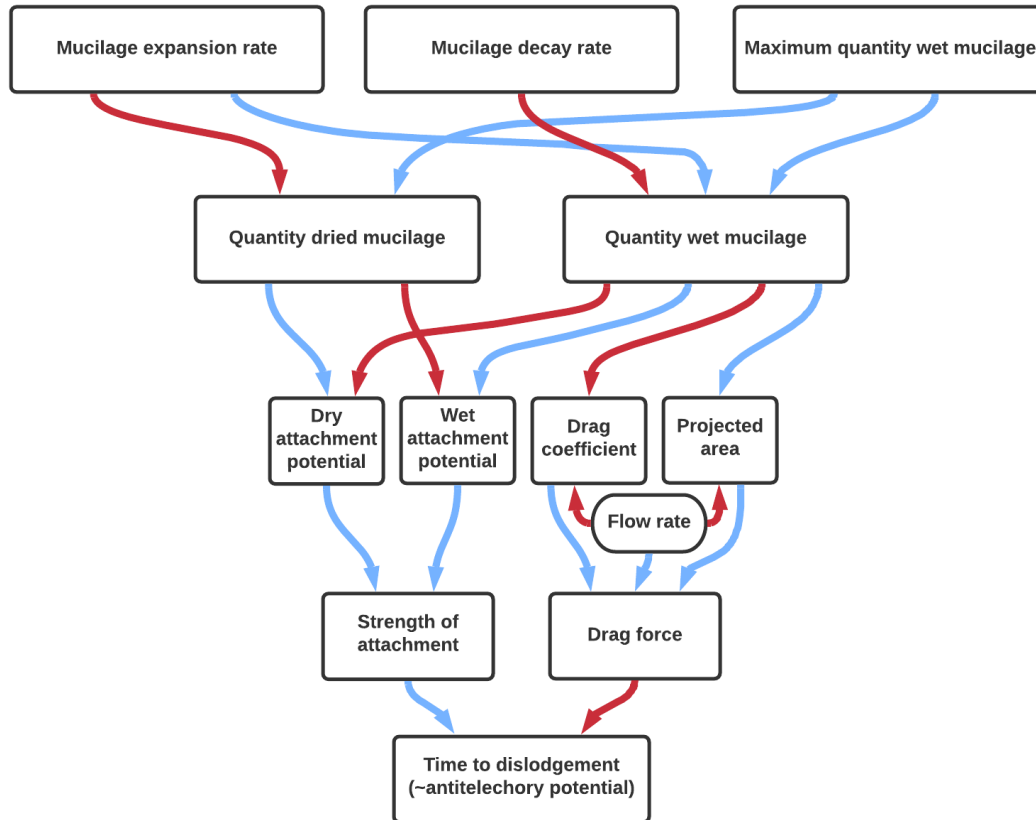

**Figure 1.** Diagram illustrating the hypothetical ways that mucilage traits may mechanically influence antitelechory. Red arrows represent a negative effect, whereas blue arrows represent a positive effect.

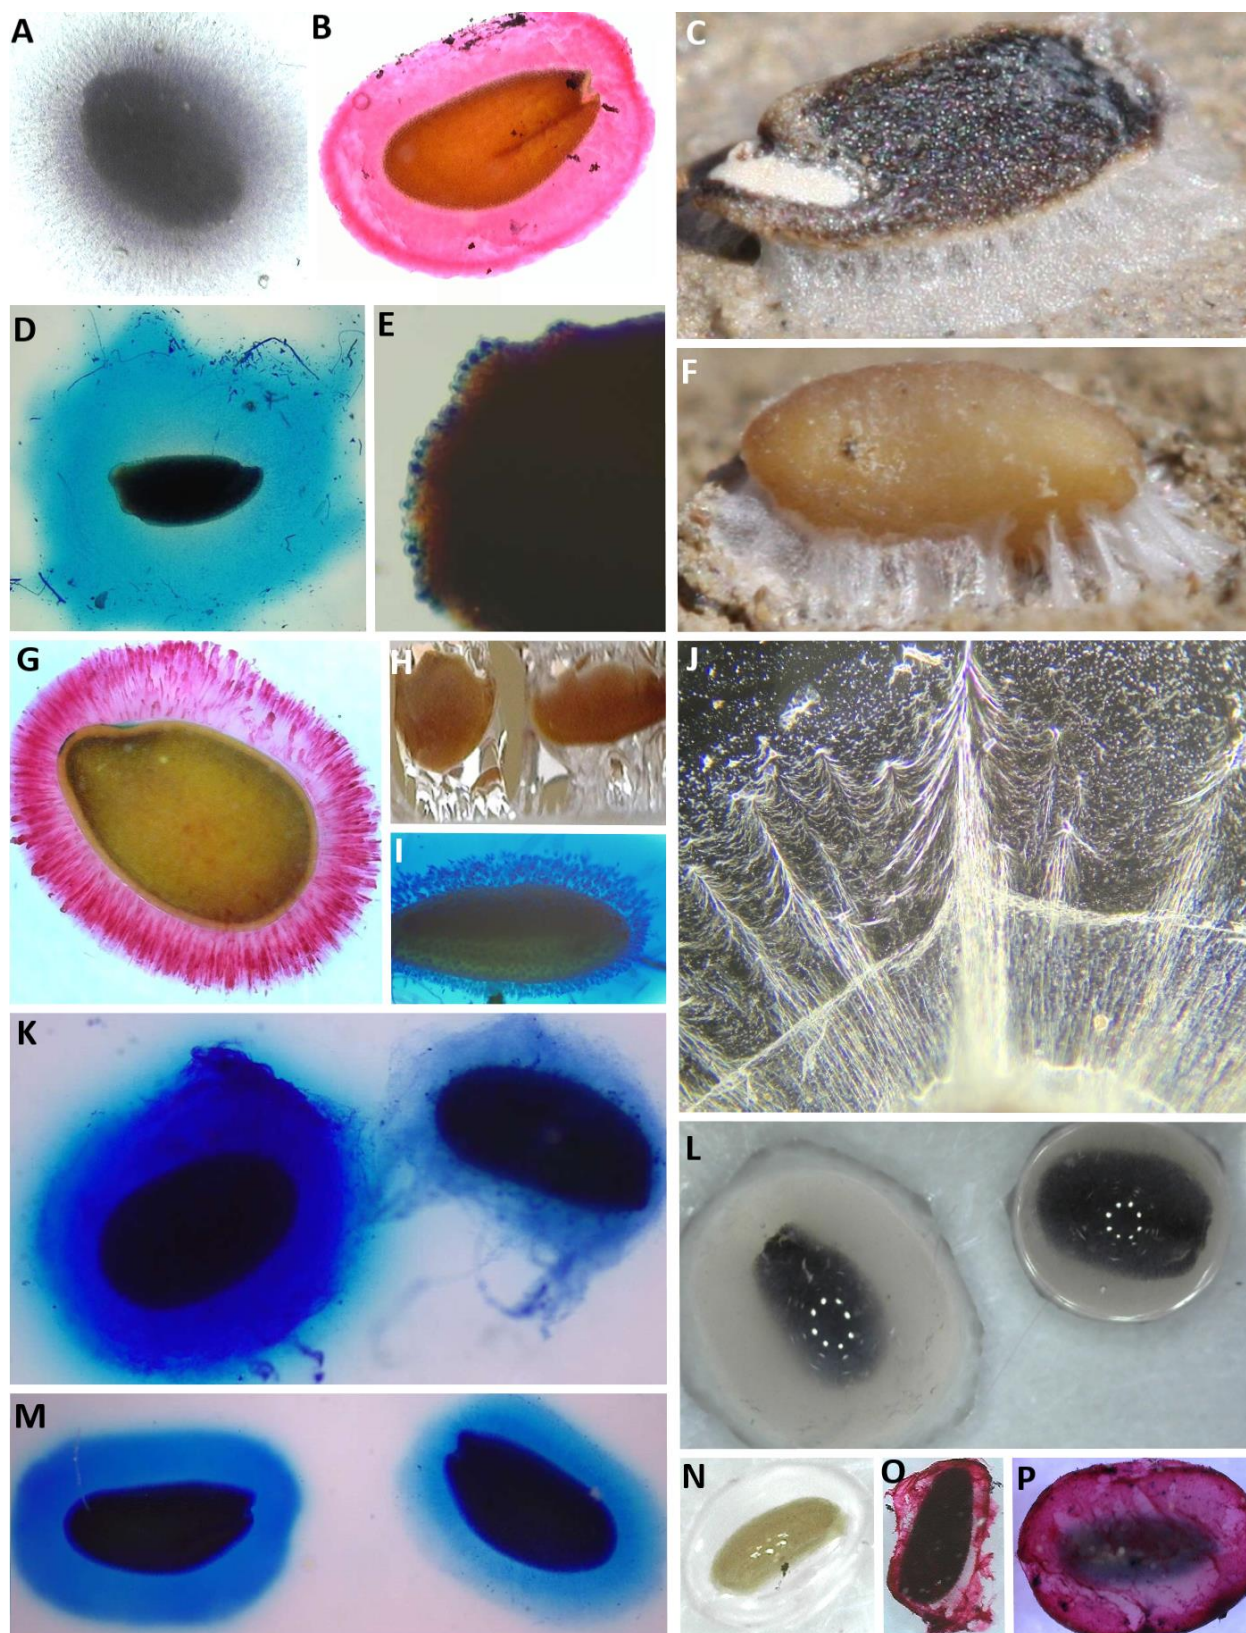

**Figure 2.** (A) *Ocimum basilicum* (Lamiaceae) with visible starch granules stained with Lugol's iodine. (B) *Lepidium sativum* (Brassicaceae), (G) *Linum grandiflorum* (Linaceae), (O) *Melissa officinalis* (Lamiaceae), and (P) *Salvia coccinea* (Lamiaceae) stained with Ruthenium red that to show different mucilage structures based on distributions of pectic sugars.

(I) *Plantago* (Plantaginaceae) seeds, pictured: *P. patagonica*, takes many times longer to fully expand their mucilage than (N) *Matricaria chamomilla* (Asteraceae) achenes. Seed mucilage also varies in quantity and projected area: (D) *Dracocephalum moldavica* (Lamiaceae) and (E) *D. parviflorum* both stained with methylene blue show different interspecific mucilage volume. (L) two unstained *O. basilicum* nutlets from the same batch show different intraspecific mucilage volumes. Mucilage decay due to extended imbibition affects mucilage quantity: (K) *S. hispanica* and (M) *Le. sativum* stained with methylene blue. The seeds on the right that were imbibed for 12 days had a thinner mucilage envelope compared to the seeds on the left that were imbibed for an hour. The attachment potential of mucilage depends on its hydration status: (C) *D. moldavica* and (F) *Gilia leptantha* (Polemoniaceae) dried mucilage strongly cemented on soil surface. (J) *Le. sativum* dried mucilage magnified under phase contrast. (H) *Li. grandiflorum* wet mucilage stretching apart by two pieces of filter paper. Staining methodology adapted from (Kreitschitz et al., 2021b)



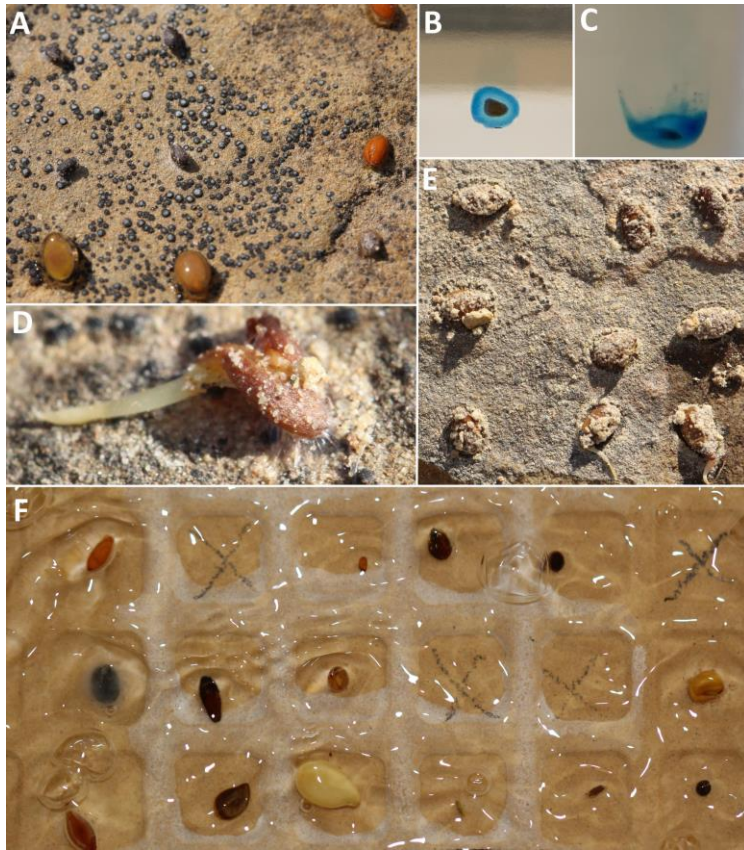

**Figure 3.** (A) Imbibed seeds with wet mucilage drying on sandstone (*Ocimum basilicum*, four in upper left; *Lepidium sativum*, two in upper right; *Linum grandiflorum*, two in lower left; *Salvia hispanica*, lower right). (B) *Gilia tricolor* and (C) *Dracocephalum* ‘blue dragon’ seeds stained with methylene blue falling in water. The mucilage envelope in C can be seen deformed and shearing off as it falls, in contrast to the limited deformation in B. (D) *Le. sativum* seed attached by dried mucilage strands on sandstone in the process of elongating its radical. (E) *Li. grandiflorum* with entrapped substrates attached to sandstone in the field, after a bout of natural surface flow. (F) Seeds attached to the back side of a tile during an erosion assay (Top row, left to right: *Le. sativum*, *Capsella bursa-pastoris*, *Prunella grandiflora*, *Plectranthus scutellarioides*; Middle row: *O. basilicum*, *Plantago maritima*, *Eruca vesicaria*, *Anastatica hierochuntica*; Bottom row: *Plantago ovata*, *Linum perenne*, *Linum usitatissimum*, *Matricaria chamomilla*, *Artemisia dracunculus*, *Thymus vulgaris*).

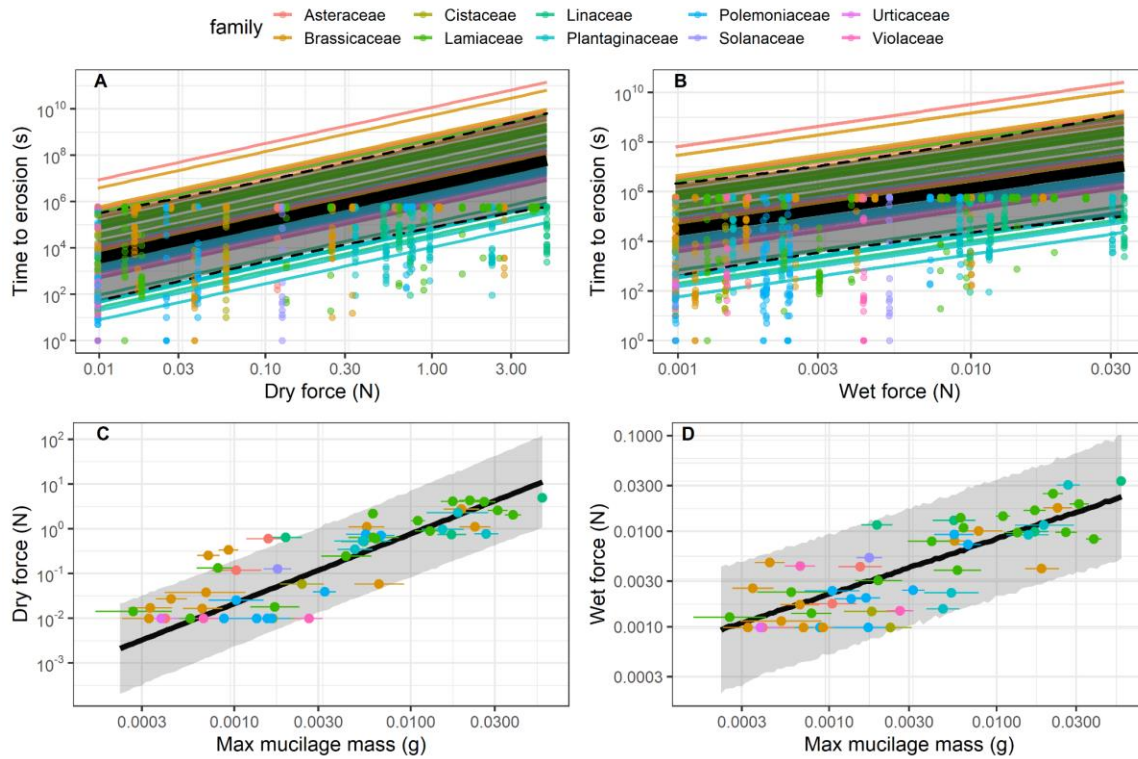

**Figure 4.** Relationship between time to erosion and dislodgement force (A & B) and between dislodgement force and fully imbibed mucilage mass (C & D) as predicted by a phylogenetic AFT multilevel model and two phylogenetic linear models. Black lines show the global relationship with grey ribbons representing the 95% CIs. Points and lines are colored by family. In A-B, species specific slopes are plotted as thinner lines. Each point corresponds to individual observed seed erosion time. In C-D, each point corresponds to imputed measurement error free mean species mucilage mass and observed mean species dislodgement force. Error bars represent 95% CIs.

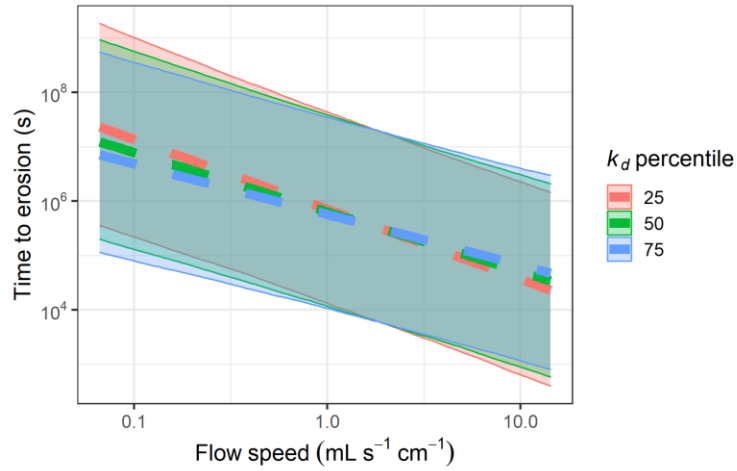

**Figure 5.** Effect of flow speed on time to erosion as predicted by a phylogenetic AFT multilevel model. Colors correspond to a seed with  $k_d$  value at the 25<sup>th</sup>, 50<sup>th</sup>, or 75<sup>th</sup> percentile. Dashed lines show the global trends with ribbons showing the 95% *CI*s.

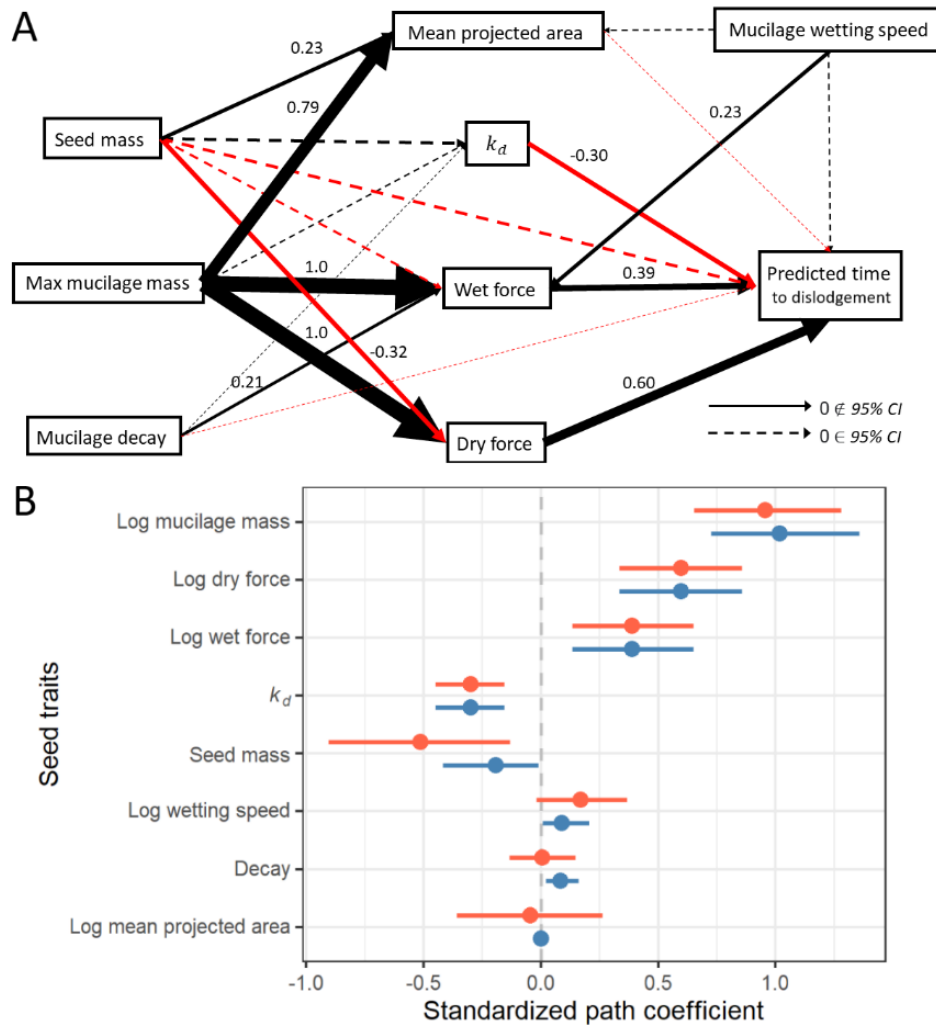

**Figure 6.** (A) Path diagram of the best SEM. Paths with 95% CI overlapping with zero are indicated by dashed lines; otherwise, they are indicated by a solid line along with their corresponding standardized path coefficient. The size and color of all paths were scaled to the magnitude and direction of the effect respectively (red = negative; black = positive). A direct path from seed mass to erosion time ( $\Delta LOOIC = 22$ ), from wetting speed to mean projected area ( $\Delta LOOIC = 6$ ), and from wetting speed to wet force were added ( $\Delta LOOIC = 23$ ), though only the path from wetting speed to wet force was significant ( $\beta = 0.23 \pm 0.10$ ,  $CI_{95} = [0.033, 0.43]$ ). This positive association was likely because seeds that released mucilage faster had more mucilage at

the time the wet dislodgement force was measured. (B) Total effect of each seed trait on predicted log species mean erosion time. Error bars represent 95% *CI*s. Total path coefficients calculated based on all paths or only significant paths are shown in red and blue respectively. All variables besides mucilage decay rate,  $k_d$ , and seed mass are on the log scale.
